# Supplementary material
Source: PubMed Central journal article supplement (PMC29286)
Supplement: pnas_98_4_1501__10.pdf [file pnas_98_4_1501__10.pdf]

**Table 2. NOE correlations**

| Proton           | NOE Correlations    |                     |                     |                     |               |               |
|------------------|---------------------|---------------------|---------------------|---------------------|---------------|---------------|
| H3 $\alpha$      | 10 (w)              | 13 $\alpha$ (m)     | 18 (w)              |                     |               |               |
| H5 $\beta$       | 20- <i>exo</i> (m)  | 6 $\alpha\beta$ (m) |                     |                     |               |               |
| H7 $\beta$       | 19 (w)              | 9 $\alpha$ (m)      | 6 $\alpha\beta$ (m) | 7 $\alpha$ (s)      |               |               |
| H7 $\alpha$      | 7 $\beta$ (s)       | 3 (m)               | 10 (m)              | 21(w) ?             |               |               |
| H9 $\alpha$      | 9 $\beta$ (s)       | 7 $\beta$ (m-w)     | 19 (w)              | 9 $\alpha$ (m)      | OH (w)        |               |
| H9 $\beta$       | 17 (m)              | 9 $\alpha$ (s)      | 2 $\beta$ (w)       | 19 (w)              |               |               |
| H10 $\alpha$     | 7 $\alpha$ (m)      | 18 (m)              | 9 $\alpha$ (m)      | 19 $\beta$ (w)      | OH (w)        |               |
| H13 $\beta$      | 14 $\beta$ (m)      | 13 $\alpha$ (s)     | 18 (vw)             | 16- <i>exo</i> (m)  |               |               |
| H14 $\alpha$     | 3 (w)               | 14 $\beta$ (s)      | 13 $\alpha$ (m)     |                     |               |               |
| H14 $\beta$      | 14 $\alpha$ (s)     | 16- <i>exo</i> (m)  | 1 (m)               | 13 $\beta$ (m)      |               |               |
| H16- <i>exo</i>  | 17- <i>endo</i> (m) | 3 $\beta$ (m)       | 14 $\beta$ (m-w)    | 1 (w)               |               |               |
| H19 $\beta$      | 20- <i>endo</i> (w) | 20- <i>exo</i> (w)  | 7 $\beta$ (m)       | 9 $\alpha\beta$ (m) | 2 $\beta$ (s) | 6 $\beta$ (m) |
| H20- <i>endo</i> | 20- <i>exo</i> (s)  | 3 (w)               | 2 $\alpha$ (s)      | 19 (w)              |               |               |
| H20- <i>exo</i>  | 20- <i>endo</i> (m) | 5 (m)               |                     |                     |               |               |
