# Supplementary material
Source: PubMed Central journal article supplement (PMC29286)

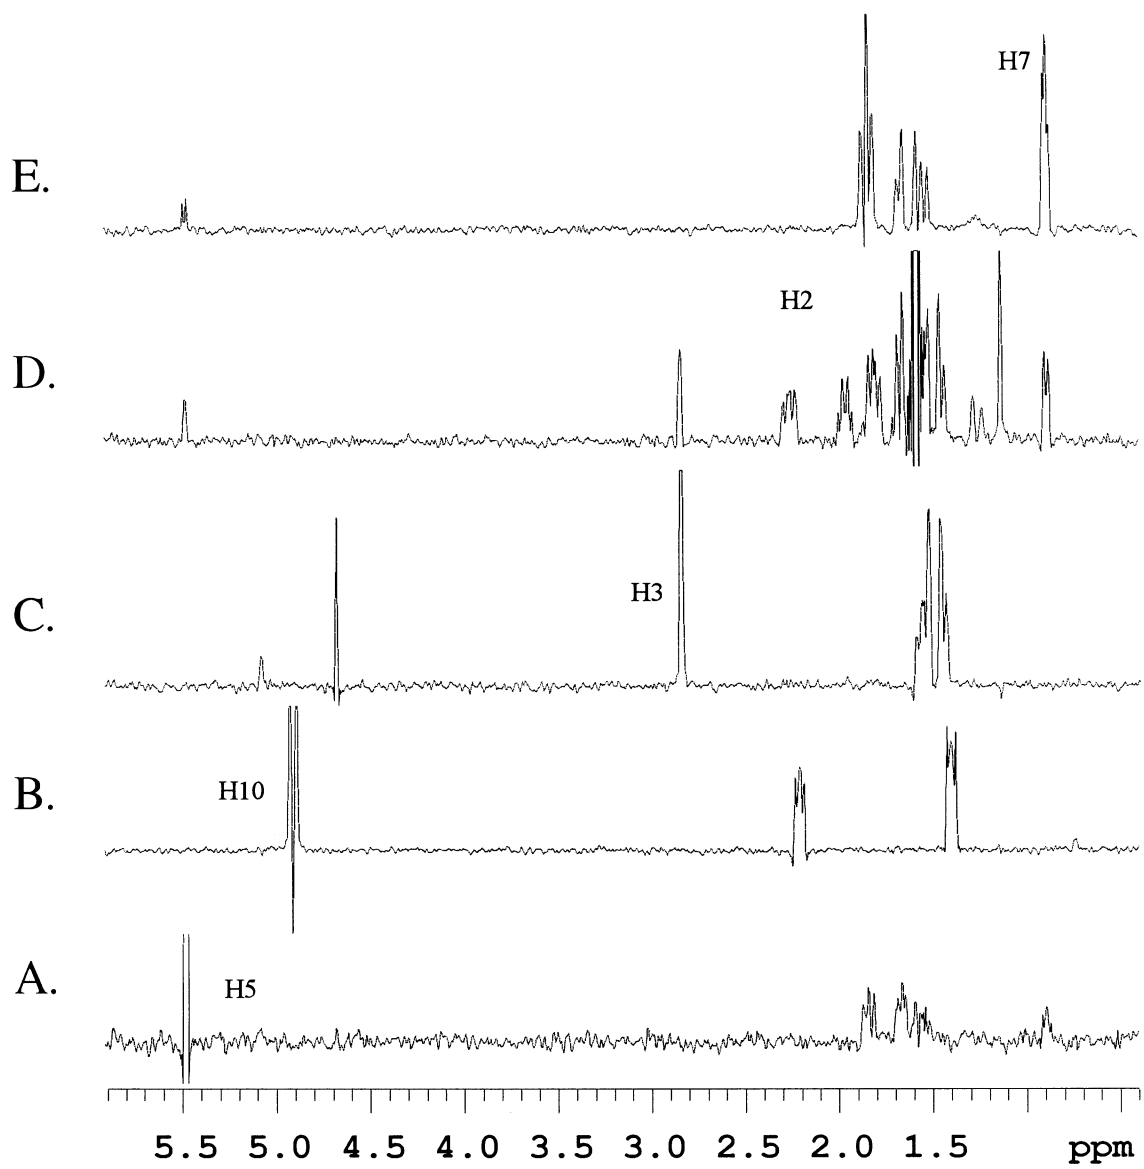

Supplement: pnas_98_4_1501__12.pdf [file pnas_98_4_1501__12.pdf]

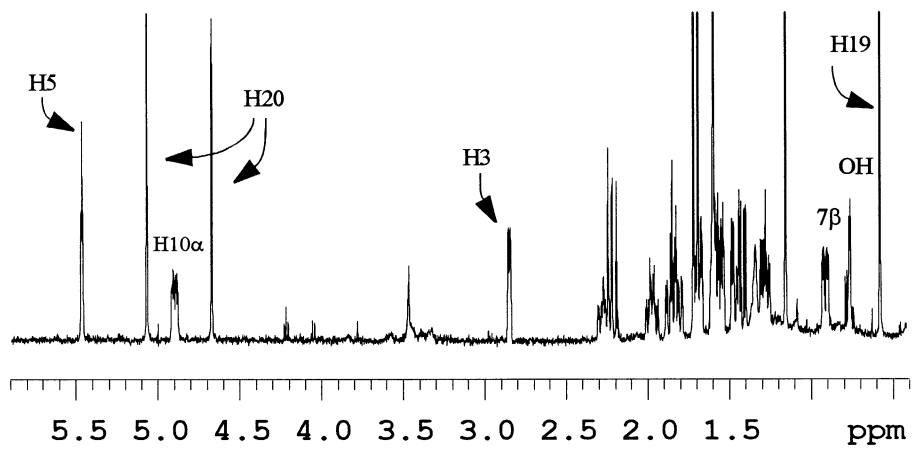

Supplement: pnas_98_4_1501__3.pdf [file pnas_98_4_1501__3.pdf]

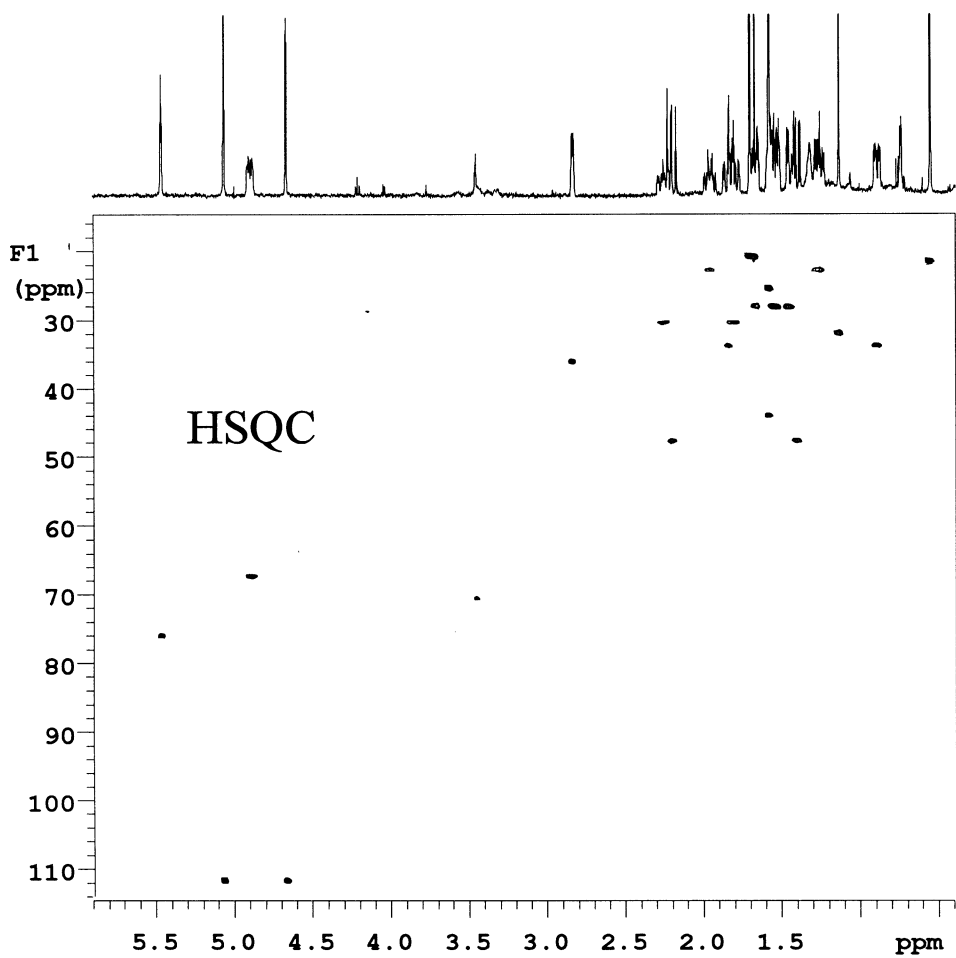

Supplement: pnas_98_4_1501__5.pdf [file pnas_98_4_1501__5.pdf]

A.

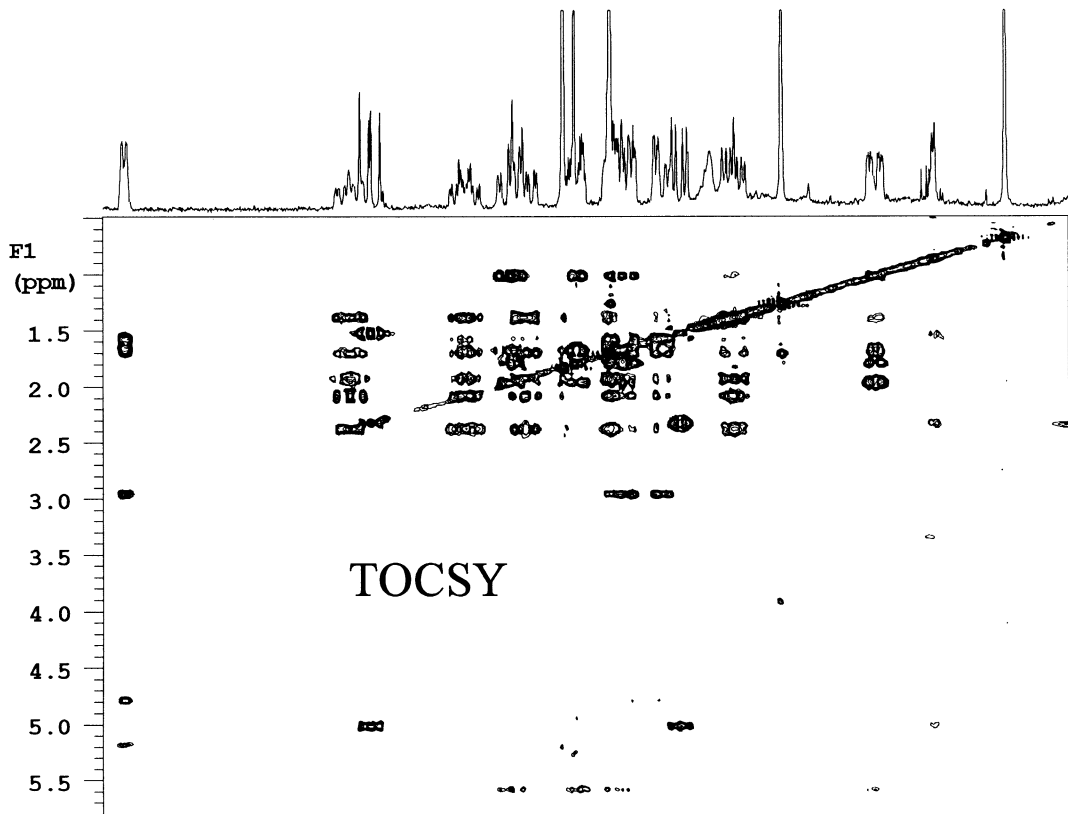

B.

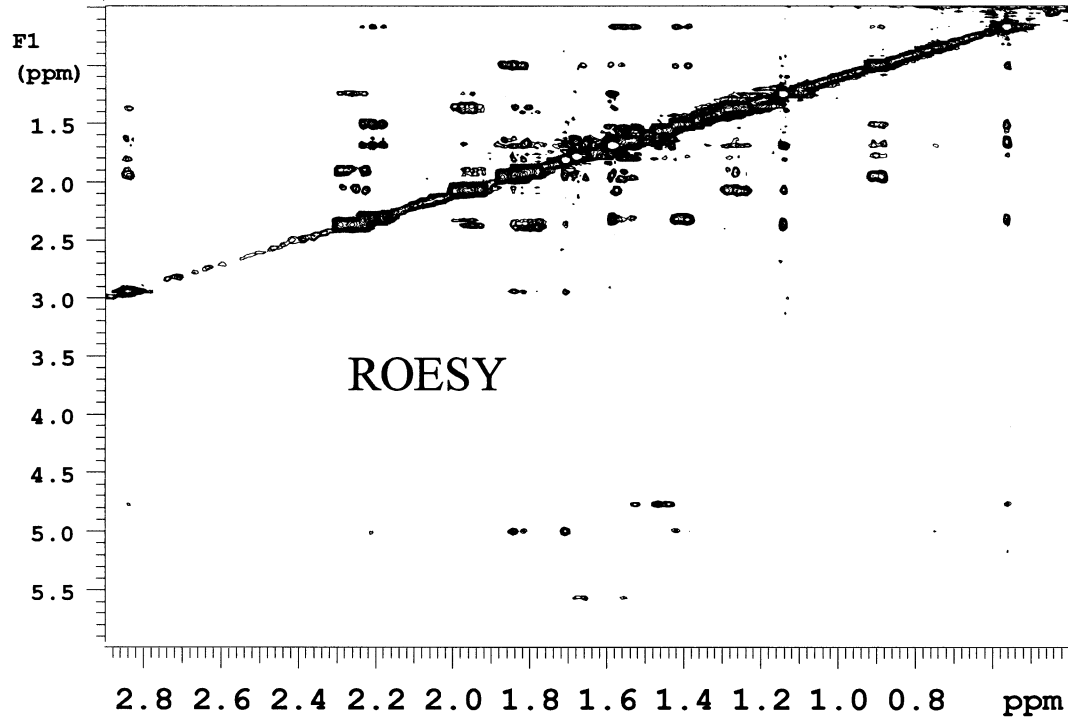

Supplement: pnas_98_4_1501__7.pdf [file pnas_98_4_1501__7.pdf]

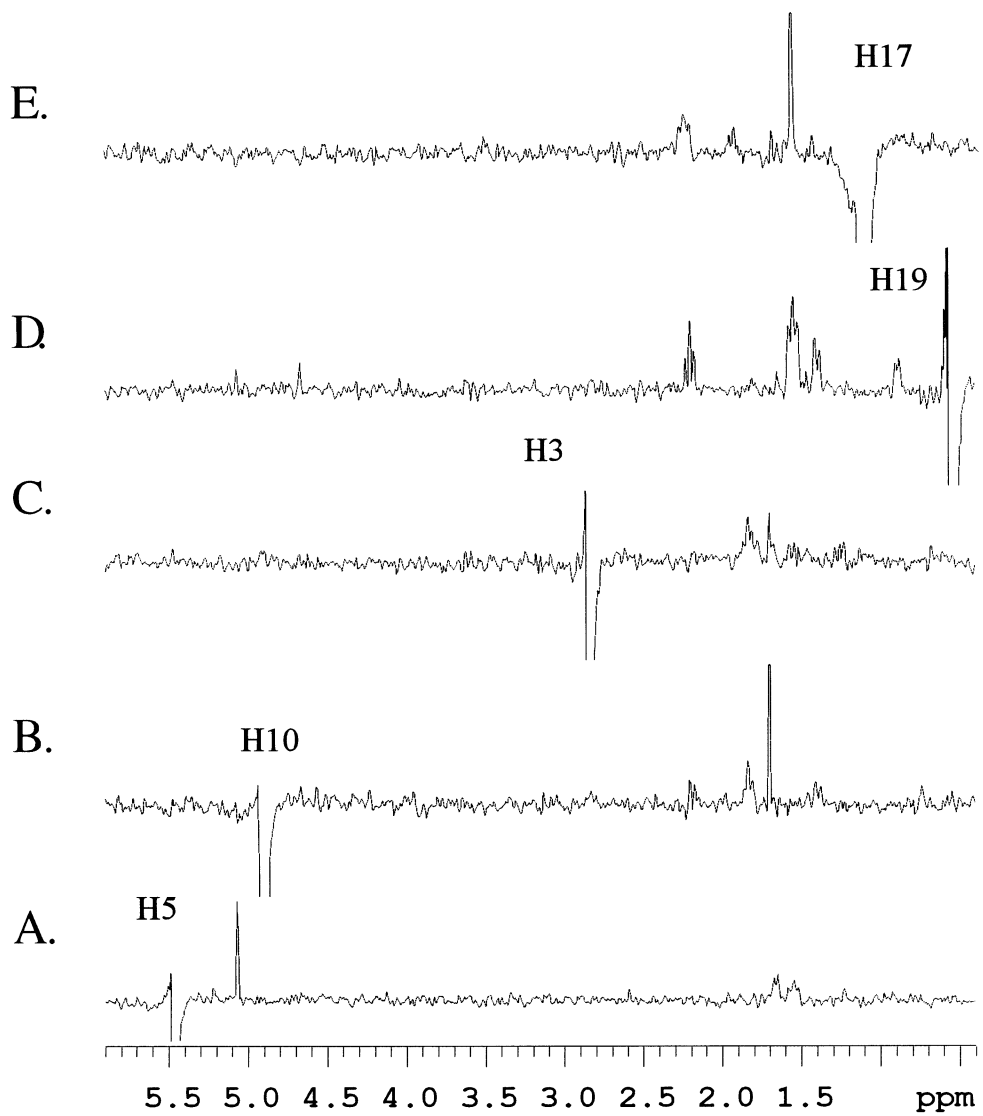

Supplement: pnas_98_4_1501__9.pdf [file pnas_98_4_1501__9.pdf]
